# Supplementary material
Source: PubMed Central journal article supplement (PMC4351174)
Supplement: NIHMS652768-supplement-Supplemental_Data.pdf [file NIHMS652768-supplement-Supplemental_Data.pdf]

**Table S1. Effect of obesity on outcomes after allogeneic hematopoietic cell transplantation: summary of literature review.**

| Study                     | Year | N     | Adult or pediatric | Match, relation              | Conditioning Intensity | Source     | Obesity definition | Outcomes in overweight or obese compared to normal weight (incidence, endpoint) |                  |                  |                  |                |
|---------------------------|------|-------|--------------------|------------------------------|------------------------|------------|--------------------|---------------------------------------------------------------------------------|------------------|------------------|------------------|----------------|
|                           |      |       |                    |                              |                        |            |                    | OS                                                                              | NRM              | Relapse          | aGVHD            | cGVHD          |
| Fleming <i>et al.</i>     | 1997 | 322   | Both               | Matched, mismatched, RD, URD | Full                   | BM, PB     | >120% IBW          | ↓<br>24%<br>120d                                                                | NR               | =<br>17%<br>120d | NR               | NR             |
| Hansen <i>et al.</i>      | 1998 | 196   | Both               | Matched URD                  | Full                   | BM         | BMI                | ↓↑                                                                              | NR               | NR               | NR               | NR             |
| Le Blanc <i>et al.</i>    | 2003 | 544   | Adult              | Matched, mismatched, RD, URD | Full                   | BM, PB     | BMI                | =<br>55%<br>5y                                                                  | =<br>33%<br>5y   | =<br>28%<br>5y   | =<br>24%<br>100d | =<br>61%<br>5y |
| Bulley <i>et al.</i>      | 2007 | 325   | Pediatric          | Matched, mismatched, RD, URD | Full                   | BM, PB, CB | BMI                | ↓<br>47%<br>5y                                                                  | ↑<br>39%<br>5y   | ↑<br>20%<br>5y   | NR               | NR             |
| Fuji <i>et al.</i>        | 2009 | 3827  | Adult              | Matched, mismatched, RD, URD | Full, reduced          | BM         | BMI                | =<br>53%<br>1y                                                                  | =<br>40%<br>1y   | =<br>21%<br>1y   | ↑<br>58%<br>100d | NR             |
| Navarro <i>et al.</i>     | 2010 | 2008  | Adult              | Matched RD                   | Full, reduced          | BM, PB     | BMI                | =<br>37%<br>5y                                                                  | =<br>30%<br>3y   | =<br>31%<br>3y   | ↑<br>36%<br>100d | =<br>32%<br>1y |
| Navarro <i>et al.</i>     | 2010 | 1779  | Adult              | Matched URD                  | Full, reduced          | BM, PB     | BMI                | =<br>27%<br>5y                                                                  | =<br>46%<br>3y   | ↓<br>25%<br>3y   | =<br>50%<br>100d | =<br>34%<br>1y |
| Nikolousis <i>et al.</i>  | 2010 | 331   | Adult              | RD, URD                      | Full, reduced          | BM, PB     | BMI                | =<br>85%<br>100d                                                                | NR               | NR               | =<br>16%<br>100d | =<br>17%<br>1y |
| Barker <i>et al.</i>      | 2011 | 1281  | Pediatric          | Matched, mismatched, RD, URD | Full, reduced          | BM         | BMI                | ↓<br>71%<br>100d                                                                | ↑<br>29%<br>100d | NR               | ↑<br>24%<br>d100 | NR             |
| Pine <i>et al.</i>        | 2011 | 200   | Pediatric          | Matched/mismatched, URD      | Full, reduced          | CB         | BMI                | =‡                                                                              | =                | NR               | =                | =              |
| Hadjibabaie <i>et al.</i> | 2012 | 192   | Adult              | Matched RD                   | Full                   | PB         | BMI                | =<br>63%<br>1y                                                                  | =<br>26%<br>1y   | =<br>18%<br>1y   | =<br>36%<br>100d | =<br>26%<br>1y |
| Sucak <i>et al.</i>       | 2012 | 71    | Adult              | Matched, mismatched, RD, URD | Full                   | BM, PB     | BMI                | =<br>36%<br>1y                                                                  | =<br>65%<br>1y   | =<br>27%<br>d100 | NR               | NR             |
| Aplenc <i>et al.</i>      | 2014 | 3687  | Pediatric          | Matched, mismatched, RD, URD | Full                   | BM         | BMI                | =<br>55%<br>3y                                                                  | ↑<br>28%<br>3y   | ↓<br>21%<br>3y   | NR               | NR             |
| Nakao <i>et al.*</i>      | 2014 | 19499 | Both               | Matched, mismatched, RD, URD | Full, reduced          | BM, PB, CB | Various            | ↓                                                                               | NR               | NR               | ↑                | NR             |

(OS – overall survival; NRM – non-relapse mortality; a/cGVHD – acute/chronic graft-versus-host disease; RD/URD – related/unrelated donor; BM – bone marrow; PB – peripheral blood; CB – cord blood; IBW – ideal body weight; BMI – body mass index; ↑ – significant increase; ↓ – significant increase, = – no change; d – day; y – year; NR – not reported)

\* Meta-analysis

† In a multivariate analysis where BMI was modeled as a continuous variable, authors report a mortality risk ratio (RR) of 1.6 (95% confidence intervals [CI] 1.2–2.2)

‡ In a multivariate analysis where obesity was used as a categorical variable, authors report the following RR: overall survival – 1.54 (CI 0.85–2.78), non-relapse mortality – 1.54 (CI 0.71–3.34), acute GVHD – 1.08 (0.61–1.9), chronic GVHD – 2.69 (1.00–7.25)

**Table S2. Clinical outcomes of children < 18 years age and patients with ALL, AML, and MDS by BMI category.**

| <b>N = 898</b>                        | <b>Underweight</b> | <b>Normal weight</b> | <b>Overweight</b> | <b>Obese</b> |
|---------------------------------------|--------------------|----------------------|-------------------|--------------|
| <b>Grade 2-4 Acute GVHD (Day 100)</b> |                    |                      |                   |              |
| Total study population                | 40%                | 33%                  | 37%               | 41%          |
| Children < 18 years of age            | 25%                | 25%                  | 27%               | 35%          |
| ALL/AML/MDS                           | 38%                | 36%                  | 34%               | 36%          |
| <b>Non-Relapse Mortality (3 year)</b> |                    |                      |                   |              |
| Total study population                | 20%                | 19%                  | 20%               | 33%          |
| Children < 18 years of age            | 25%                | 8%                   | 13%               | 20%          |
| ALL/AML/MDS                           | 13%                | 17%                  | 18%               | 25%          |
| <b>Relapse (3 year)</b>               |                    |                      |                   |              |
| Total study population                | 30%                | 41%                  | 37%               | 30%          |
| Children < 18 years of age            | 38%                | 28%                  | 20%               | 29%          |
| ALL/AML/MDS                           | 38%                | 49%                  | 37%               | 33%          |
| <b>Overall Survival (3 year)</b>      |                    |                      |                   |              |
| Total study population                | 59%                | 48%                  | 47%               | 43%          |
| Children < 18 years of age            | 60%                | 66%                  | 80%               | 50%          |
| ALL/AML/MDS                           | 75%                | 40%                  | 48%               | 45%          |

Clinical Outcomes: Cumulative incidences (%) of grade 2-4 acute GVHD (day 100) and non-relapse mortality and relapse (3 year), and overall survival (3 year).

ALL – acute lymphoblastic leukemia; AML – acute myelogenous leukemia; MDS – myelodysplastic syndrome; BMI – body mass index; GVHD – graft-versus-host disease.

Total study population: n=898 underweight n=20, normal weight n=290, overweight n=287, obese n=301  
 Children < 18 years age: n=101 underweight n=8, normal weight n=61, overweight n=15, obese n=17  
 ALL/AML/MDS: n=514 underweight n=8, normal weight n=146, overweight n=172, obese n=188
